# Supplementary material
Source: MDPI journal article supplement (https://www.mdpi.com/2073-4344/12/8/868)

## Supporting information

### Design a novel sonophotoreactor for green and sustainable organic synthesis: Explorative sonophotocatalytic study of C-H arylation reaction of pyrazoles

Tamer S. Saleh<sup>1,4\*</sup>, Abdullah S. Al-Bogami<sup>1</sup>, Katabathini Narasimharao<sup>2</sup>, Ziya A. Khan<sup>1</sup>, I. Amenabar<sup>3</sup>, Mohamed Mokhtar<sup>2\*</sup>

<sup>1</sup> University of Jeddah, College of Science, Department of Chemistry, Jeddah, Saudi Arabia

<sup>2</sup> Chemistry Department, Faculty of Science, King Abdulaziz University, P.O. Box 80203, Jeddah 21589, Saudi Arabia

<sup>3</sup> nanoGUNE BRTA and Department of Electricity and Electronics, UPV/EHU, Donostia-San Sebastián, Spain

<sup>4</sup> Green Chemistry Department, National Research Centre, Dokki, 12622, Giza, Egypt

## S1. Experimental

### S1.1. The synthesized compounds with their physical data

#### *phenyl(1,3,5-triphenyl-1H-pyrazol-4-yl)methanone (3a)*

White solid, IR (KBr): 1719 (CO), 1596 (C=N)  $\text{cm}^{-1}$ ;  $^1\text{H}$  NMR (400MHz, DMSO- $d_6$ )  $\delta$ : 7.39-7.43 (m, 3H, ArH), 7.49-7.55 (m, 5H, ArH), 7.57-7.61 (m, 6H, ArH), 7.61-7.67 (m, 5H, ArH), 7.78-7.81 (m, 1H, ArH);  $^{13}\text{C}$  NMR (100.62 MHz, DMSO- $d_6$ )  $\delta$ : 116.1, 122.3, 125.6, 126.1, 126.2, 128.35, 128.36, 129.5, 129.8, 133.37, 133.38, 133.5, 140.9, 141.0, 152.8, 193.4. MS (m/z): 400 ( $\text{M}^+$ ). (Found: C, 83.84; H, 4.95; N, 6.91;  $\text{C}_{28}\text{H}_{20}\text{N}_2\text{O}$  requires C, 83.98; H, 5.03; N, 7.00).

#### *1-(4-benzoyl-1,5-diphenyl-1H-pyrazol-3-yl)ethan-1-one (3b)*

Off White solid, IR (KBr): 1716, 1705 (2CO), 1591 (C=N)  $\text{cm}^{-1}$ ;  $^1\text{H}$  NMR (400MHz, DMSO- $d_6$ )  $\delta$ : 2.55 (s, 3H,  $\text{CH}_3$ ), 7.15-7.17 (m, 2H, ArH), 7.24-7.29 (m, 3H, ArH), 7.42-7.47 (m, 7H, ArH), 7.59 (t, 1H,  $J = 7.32$  Hz, ArH), **7.77 (d, 2H,  $J = 7.24$  Hz, ArH)**;  $^{13}\text{C}$  NMR (100.62 MHz, DMSO- $d_6$ )  $\delta$ : 26.8, 121.7, 126.3, 128.1, 128.9, 129.1, 129.4, 129.6, 129.8, 129.9, 133.9, 137.9, 139.0, 143.8, 149.0, 191.5, 193.1. MS (m/z): 366 ( $\text{M}^+$ ). (Found: C, 78.91; H, 4.86; N, 7.54;  $\text{C}_{24}\text{H}_{18}\text{N}_2\text{O}_2$  requires C, 78.67; H, 4.95; N, 7.65).

#### *1-(4-Benzoyl-1-(4-fluorophenyl)-5-phenyl-1H-pyrazol-3-yl)ethan-1-one (3c)*

Off White solid, IR (KBr): 1719, 1711 (2CO), 1591 (C=N)  $\text{cm}^{-1}$ ;  $^1\text{H}$  NMR (400MHz, DMSO- $d_6$ )  $\delta$ : 2.54 (s, 3H,  $\text{CH}_3$ ), 7.17 (d, 2H,  $J = 7.7$  Hz, ArH), 7.27-7.33 (m, 5H, ArH), 7.43-7.57 (m, 4H, ArH), 7.57-7.60 (m, 1H, ArH), **7.78 (d, 2H,  $J = 7.4$  Hz, ArH)**;  $^{13}\text{C}$  NMR (100.62 MHz, DMSO- $d_6$ )  $\delta$ : 26.8, 116.5 (**d,  $^2J_{\text{CF}} = 21.2$  Hz**), 121.7, 127.9, 128.7 (**d,  $^3J_{\text{CF}} = 8.6$  Hz**), 128.8, 129.4, 129.9, 130.0, 133.9, 135.40, 135.43, 137.9, 144.0, 149.0, **161.0 (d,  $^1J_{\text{CF}} = 243.1$  Hz)**, 191.5, 193.1. MS (m/z): 384 ( $\text{M}^+$ ). (Found: C, 75.24; H, 4.41; N, 7.17;  $\text{C}_{24}\text{H}_{17}\text{FN}_2\text{O}_2$  requires C, 74.99; H, 4.46; N, 7.29).

#### *1-(4-benzoyl-5-phenyl-1-(p-tolyl)-1H-pyrazol-3-yl)ethan-1-one (3d)*

Beige solid, IR (KBr): 1714, 1710 (2CO), 1595 (C=N)  $\text{cm}^{-1}$ ;  $^1\text{H}$  NMR (400MHz, DMSO- $d_6$ )  $\delta$ : 2.36 (s, 3H,  $\text{CH}_3$ ), 2.57 (s, 3H,  $\text{CH}_3$ ), 7.19-7.21 (m, 2H, ArH), 7.27-7.35 (m, 7H, ArH), 7.49 (t, 2H,  $J = 7.64$  Hz, ArH), 7.62 (t, 1H,  $J = 7.32$  Hz, ArH), 7.80 (d, 2H,  $J = 7.44$  Hz, ArH);  $^{13}\text{C}$  NMR (100.62 MHz, DMSO- $d_6$ )  $\delta$ : 21.1, 26.8, 121.7, 126.1, 128.9, 129.1, 129.4, 129.8, 129.9, 130.1, 133.9, 136.6, 137.9, 139.0, 143.8, 148.9, 191.5, 193.1. MS (m/z): 380 ( $\text{M}^+$ ). (Found: C, 79.18; H, 5.22; N, 7.23;  $\text{C}_{25}\text{H}_{20}\text{N}_2\text{O}_2$  requires C, 78.93; H, 5.30; N, 7.36).

***1-(4-Benzoyl-5-phenyl-1-(4-(trifluoromethyl)phenyl)-1H-pyrazol-3-yl)ethan-1-one (3e)***

Puff solid, IR (KBr): 1715, 1711 (2 CO), 1599(C=N)  $\text{cm}^{-1}$ ;  $^1\text{H}$  NMR (400MHz, DMSO- $d_6$ )  $\delta$ : 2.56 (s, 3H,  $\text{CH}_3$ ), 7.21 (d, 2H,  $J = 7.2$  Hz, ArH), 7.28-7.33 (m, 3H, ArH), 7.44-7.48 (m, 2H, ArH), 7.57-7.66 (m, 3H, ArH), 7.79 (d, 2H,  $J = 7.8$  Hz, ArH), 7.84-7.86 (m, 2H, ArH);  $^{13}\text{C}$  NMR (100.62 MHz, DMSO- $d_6$ )  $\delta$ : 26.83, 122.3, 122.8, 125.5 (q,  $^1J_{\text{CF}} = 274.3$  Hz), 126.86, 126.89, 127.7, 129.15, 129.2, 129.4, 129.5, 130.0, 133.9, 137.8, 142.1, 143.9, 149.5, 191.3, 193.1. MS (m/z): 434 ( $\text{M}^+$ ). (Found: C, 69.34; H, 3.87; N, 6.36;  $\text{C}_{25}\text{H}_{17}\text{F}_3\text{N}_2\text{O}_2$  requires C, 69.12; H, 3.94; N, 6.45.)

***ethyl 4-benzoyl-1,5-diphenyl-1H-pyrazole-3-carboxylate (3f)***

Off White solid, IR (KBr): 1739, 1710 (2CO), 1603 (C=N)  $\text{cm}^{-1}$ ;  $^1\text{H}$  NMR (400 MHz, DMSO- $d_6$ )  $\delta$ : 0.95 (t, 3H,  $J = 7.08$  Hz,  $\text{CH}_3$  ester), 4.05 (q, 2H,  $J = 7.08$  Hz,  $\text{CH}_2$  ester), 7.18 (d, 2H,  $J = 6.8$  Hz, ArH), 7.25-7.30 (m, 3H, ArH), 7.39-7.50 (m, 7H, ArH), 7.62 (t, 1H,  $J = 7.62$  Hz, ArH), 7.79 (d, 2H,  $J = 7.48$  Hz, ArH);  $^{13}\text{C}$  NMR (100.62 MHz, DMSO- $d_6$ )  $\delta$ : 13.9, 61.3, 123.1, 126.4, 128.0, 128.9, 129.2, 129.4, 129.6, 129.8, 130.2, 134.0, 138.2, 138.9, 141.9, 143.9, 161.2, 190.9. MS (m/z): 396 ( $\text{M}^+$ ). (Found: C, 75.96; H, 4.99; N, 6.98;  $\text{C}_{25}\text{H}_{20}\text{N}_2\text{O}_3$  requires C, 75.74; H, 5.09; N, 7.07.)

***Ethyl 4-benzoyl-1-(4-fluorophenyl)-5-phenyl-1H-pyrazole-3-carboxylate (3g)***

Off White solid, IR (KBr): 1742, 1712 (2CO), 1601 (C=N)  $\text{cm}^{-1}$ ;  $^1\text{H}$  NMR (400 MHz, DMSO- $d_6$ )  $\delta$ : 0.95 (t, 3H,  $J = 7.08$  Hz,  $\text{CH}_3$  ester), 4.05 (q, 2H,  $J = 7.08$  Hz,  $\text{CH}_2$  ester), 7.19 (d, 2H,  $J = 6.6$  Hz, ArH), 7.26-7.31 (m, 5H, ArH), 7.48 (t, 4H,  $J = 7.76$  Hz, ArH), 7.61 (t, 1H,  $J = 7.4$  Hz, ArH), 7.80 (d, 2H,  $J = 7.52$  Hz, ArH);  $^{13}\text{C}$  NMR (100.62 MHz, DMSO- $d_6$ )  $\delta$ : 13.9, 61.3, 116.4 (d,  $^2J_{\text{CF}} = 22.8$  Hz), 116.6, 123.0, 127.9, 128.8 (d,  $^3J_{\text{CF}} = 9.2$  Hz), 128.9, 129.2, 130.2, 134.0, 135.4 (d,  $^4J_{\text{CF}} = 2.4$  Hz), 138.2, 141.9, 144.1, 162.2 (d,  $^1J_{\text{CF}} = 247.5$  Hz), 190.9. MS (m/z): 414 ( $\text{M}^+$ ). (Found: C, 72.68; H, 4.54; N, 6.65;  $\text{C}_{25}\text{H}_{19}\text{FN}_2\text{O}_3$  requires C, 72.45; H, 4.62; N, 6.76.)

***ethyl 4-benzoyl-5-phenyl-1-(p-tolyl)-1H-pyrazole-3-carboxylate (3h)***

Off White solid, IR (KBr): 1744, 1710 (2CO), 1601 (C=N)  $\text{cm}^{-1}$ ;  $^1\text{H}$  NMR (400 MHz, DMSO- $d_6$ )  $\delta$ : 0.94 (t, 3H,  $J = 7.04$  Hz,  $\text{CH}_3$  ester), 2.30 (s, 3H,  $\text{CH}_3$ ), 4.04 (q, 2H,  $J = 7.04$  Hz,  $\text{CH}_2$  ester), 7.18-7.28 (m, 9H, ArH), 7.47 (t, 2H,  $J = 7.68$  Hz, ArH), 7.61 (t, 1H,  $J = 7.36$  Hz, ArH), 7.79 (d, 2H,  $J = 7.28$  Hz, ArH);  $^{13}\text{C}$  NMR (100.62 MHz, DMSO- $d_6$ )  $\delta$ : 13.9, 21.1, 61.2, 123.0, 126.1, 128.1, 128.9, 129.2, 129.5, 129.8, 129.9, 130.2, 133.9, 136.6, 138.2, 139.0, 141.7, 143.8, 161.2, 190.9. MS (m/z): 410 ( $\text{M}^+$ ). (Found: C, 76.30; H, 5.32; N, 6.71;  $\text{C}_{26}\text{H}_{22}\text{N}_2\text{O}_3$  requires C, 76.08; H, 5.40; N, 6.82.)

### ***S1.2. Single-crystal X-ray determination***

The compounds **3c** and **3e** were synthesized through slow evaporation of solvent to give single crystals suitable for single-crystal X-ray diffraction studies. The crystals were viewed under the microscope for the selection of suitable samples for data collection. The certain selected sample was fixed on the tip of thin glass fiber, which was interleaved in the wax. This sample was mounted on Agilent Supernova (Dual source) Agilent Technologies Diffractometer for each sample, equipped with microfocus Cu/Mo Ka radiation for data collection. The data collection was accomplished using CrysAlisPro software [62] at 296 K under the Mo Ka radiation. The structure solution was performed using SHELXSe2013 method [63] and refined by full-matrix least-squares methods on F<sup>2</sup> using the SHELXLe2013 method [64], in-built with WinGX [64]. All non-hydrogen atoms were refined anisotropically by full-matrix least-squares methods [63].

## S2: An illustration of our design

### 1. A schematic illustration of our design with dimensions

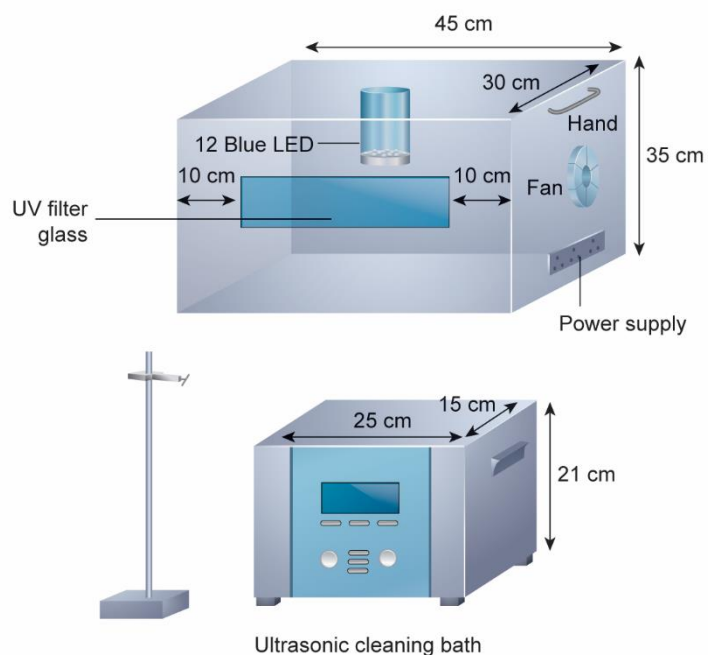

### 2. The Designed Reactor

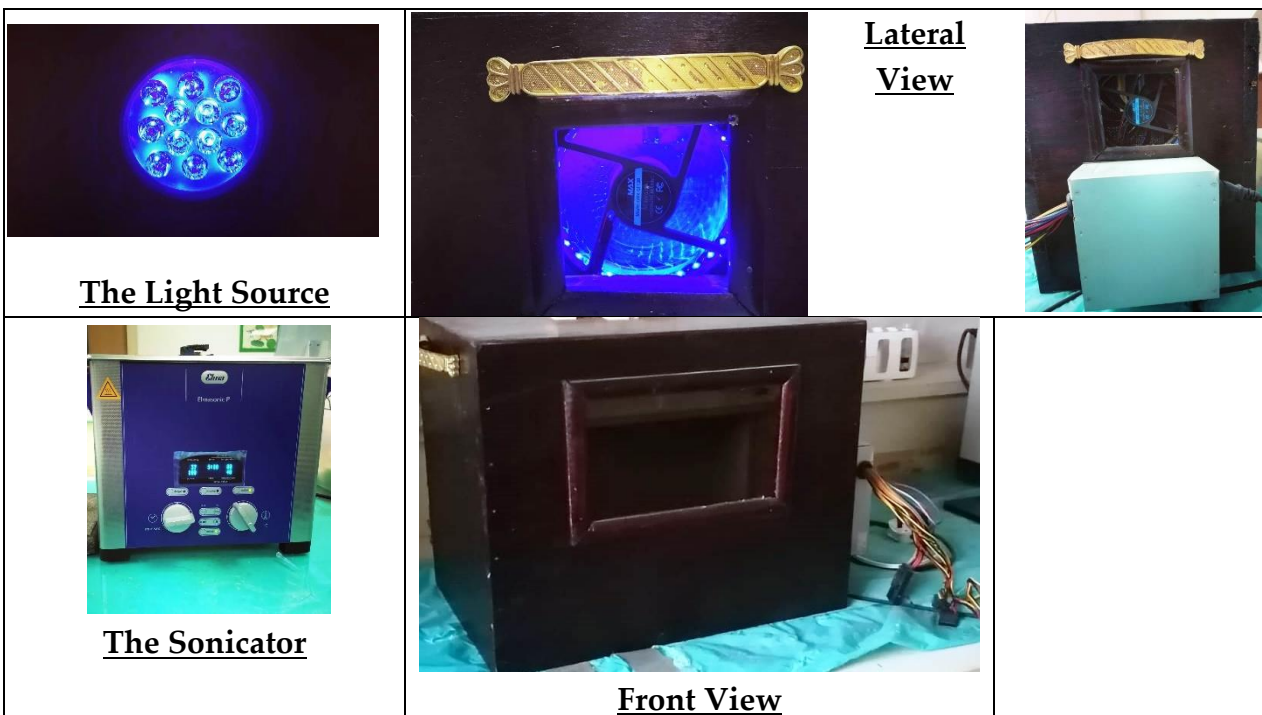

## S3: Copies of NMR Data

<sup>1</sup>H NMR of 3b

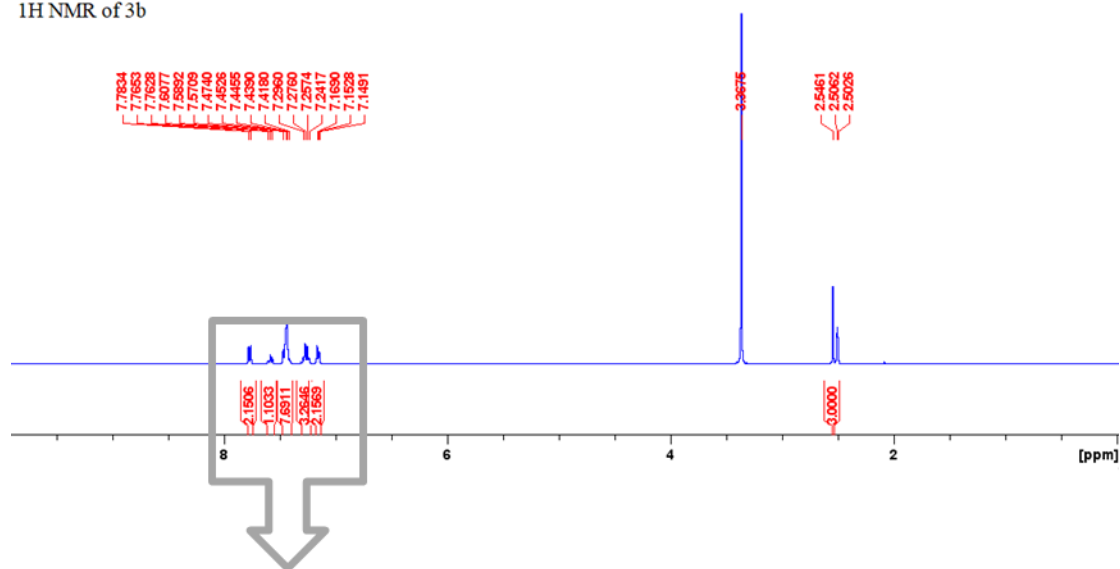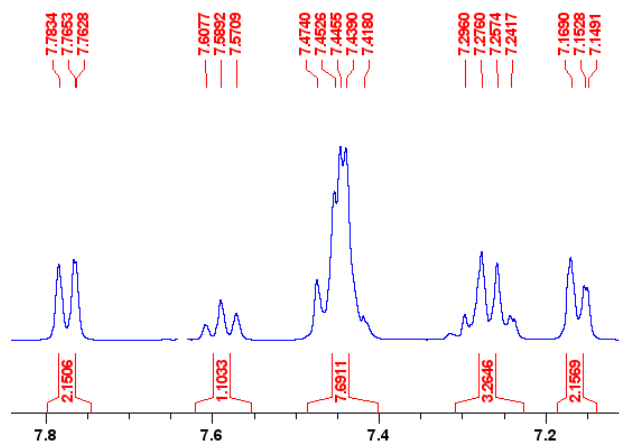

<sup>13</sup>C NMR of 3b

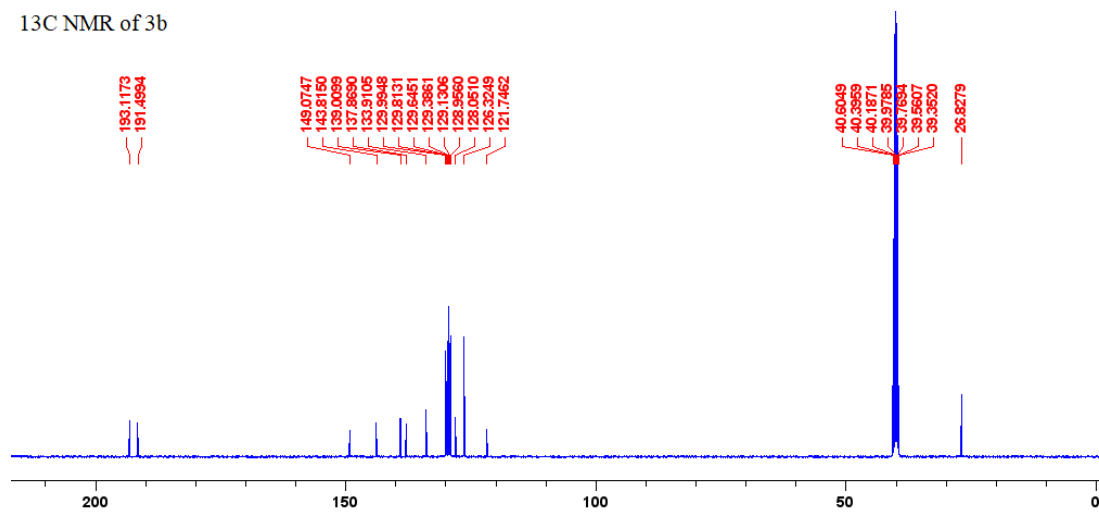

<sup>1</sup>H NMR of 3c

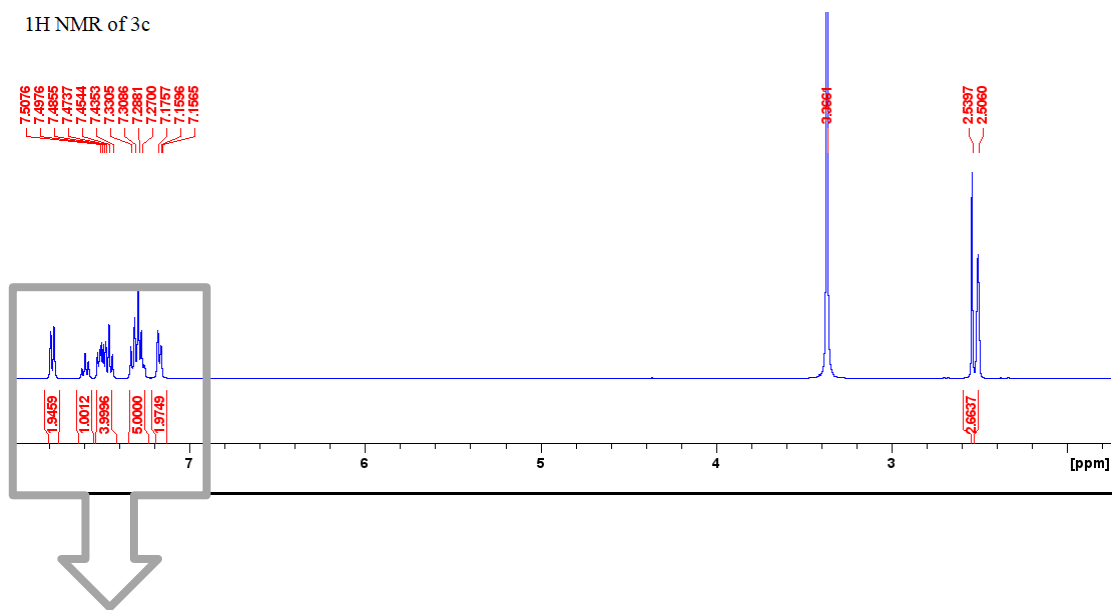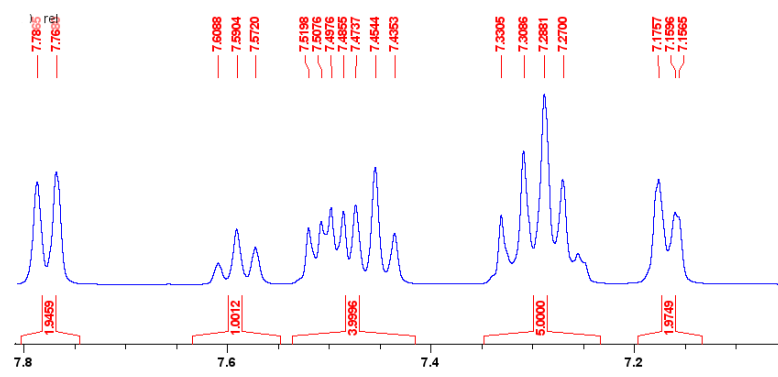

<sup>13</sup>C NMR of 3c

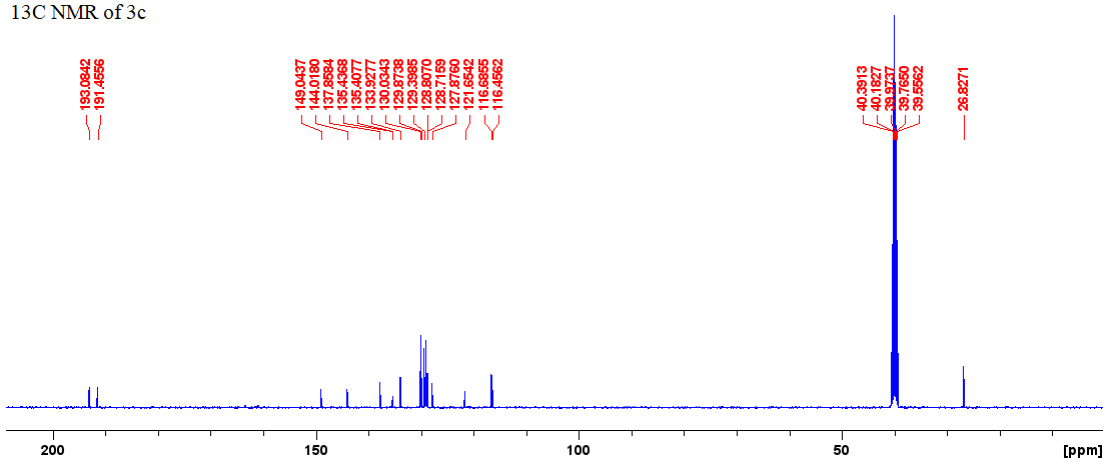

<sup>1</sup>H NMR of 3d

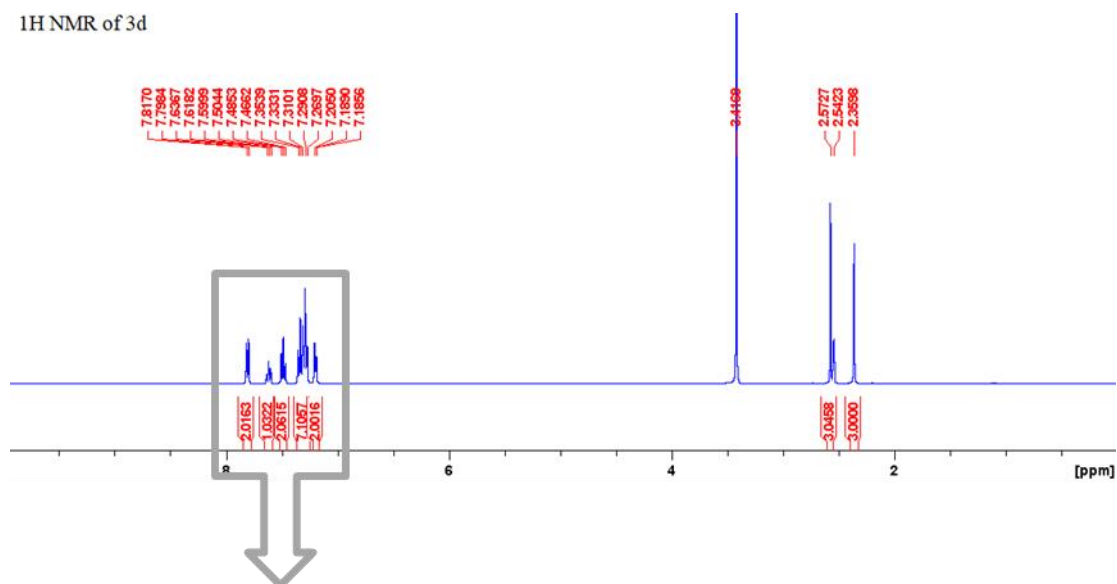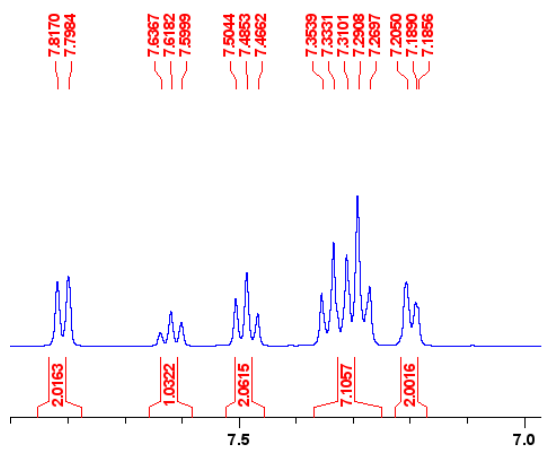

<sup>13</sup>C NMR of 3d

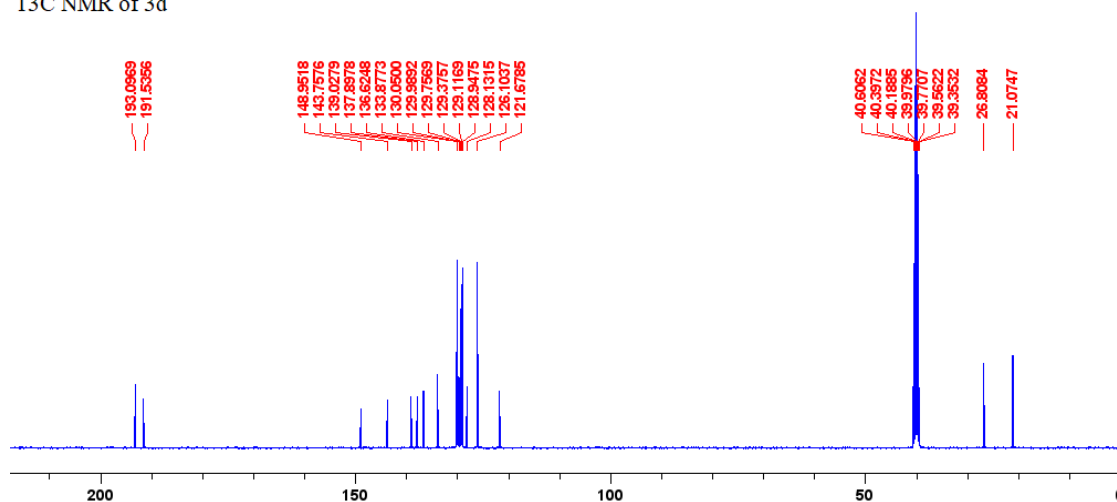

<sup>1</sup>H NMR of 3e

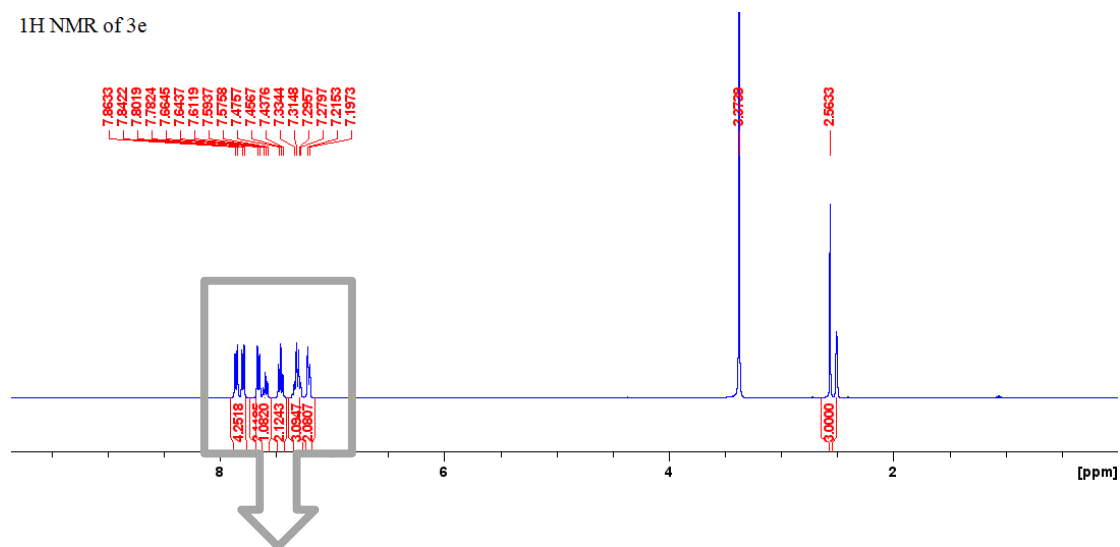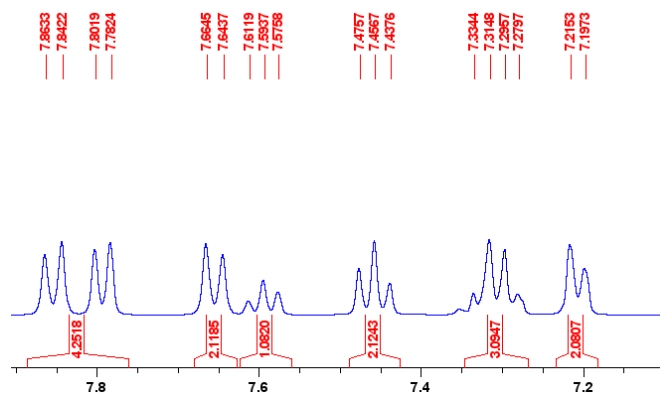

<sup>13</sup>C NMR of 3e

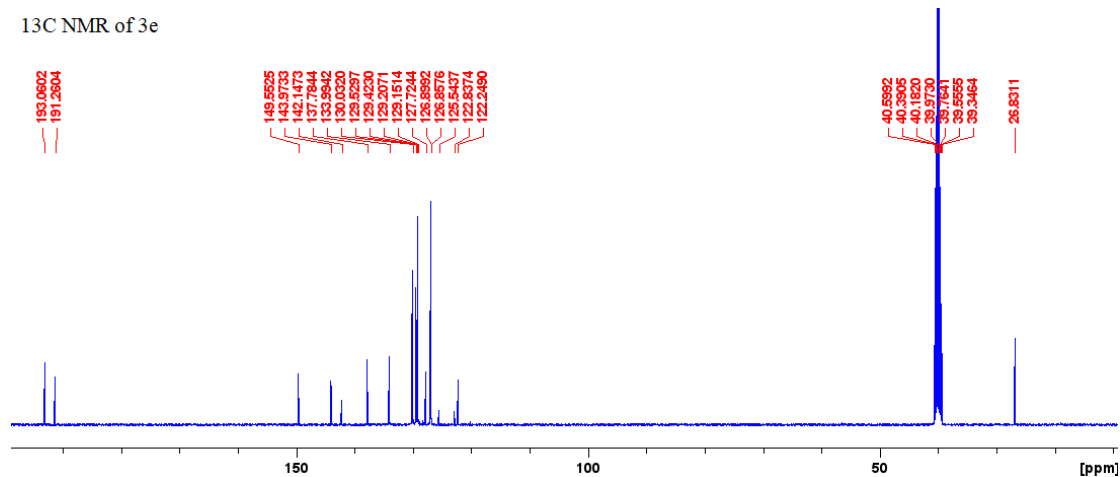



<sup>1</sup>H NMR of 3f

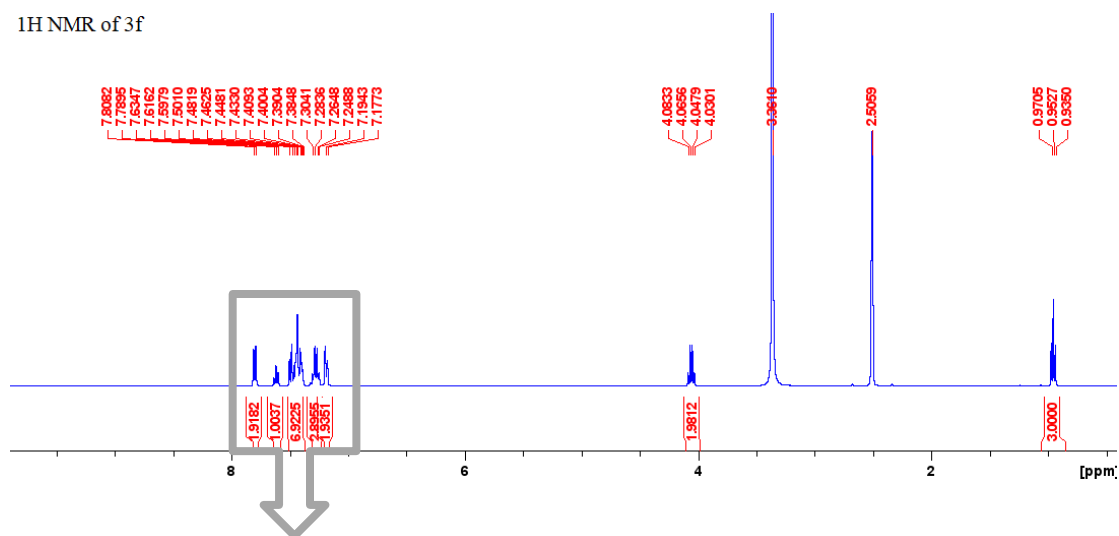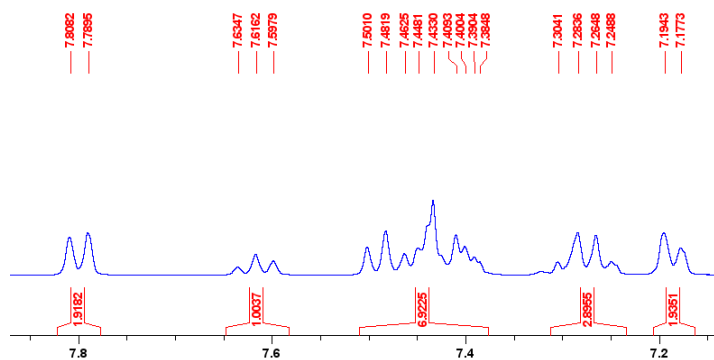

<sup>13</sup>C NMR of 3f

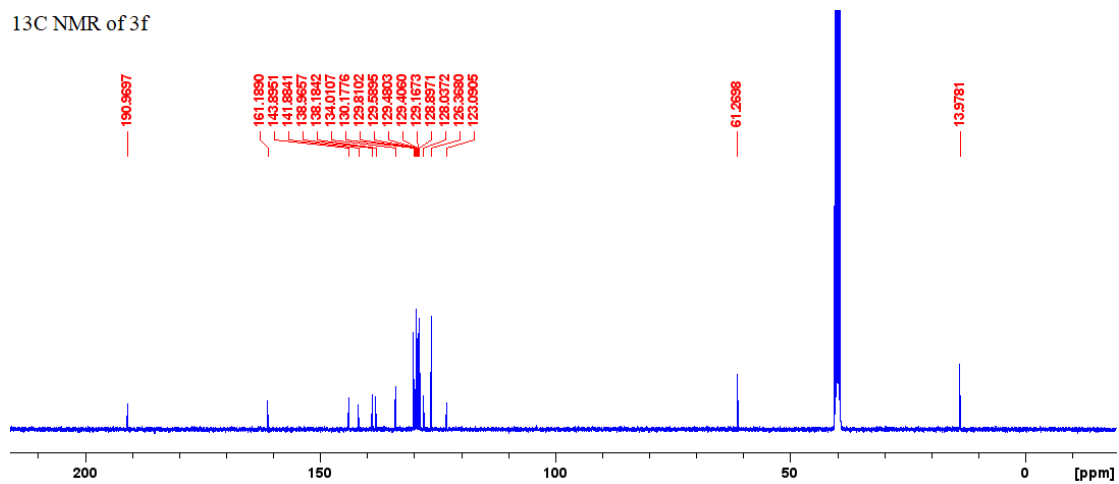

<sup>1</sup>H NMR of 3g

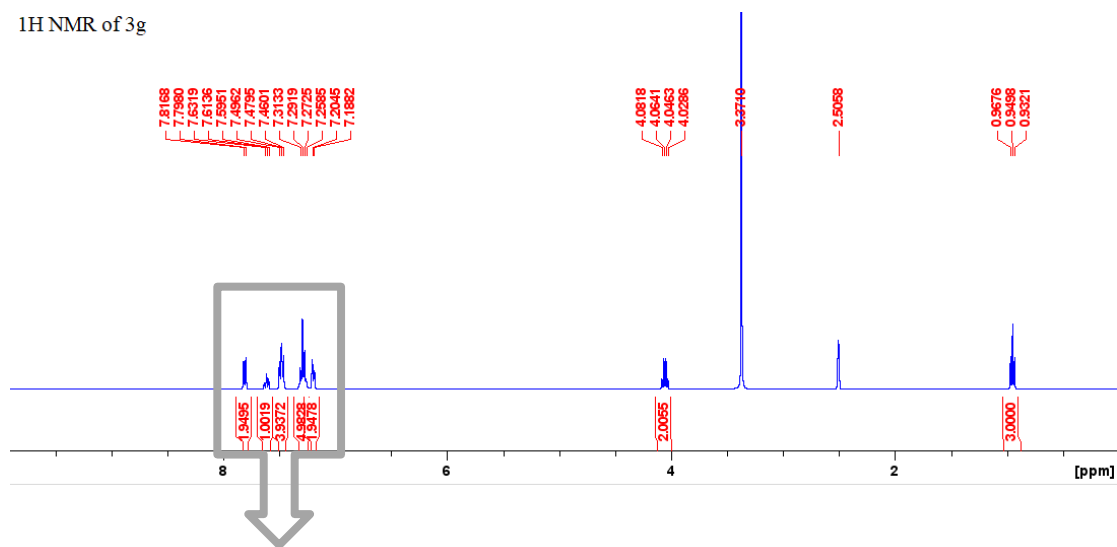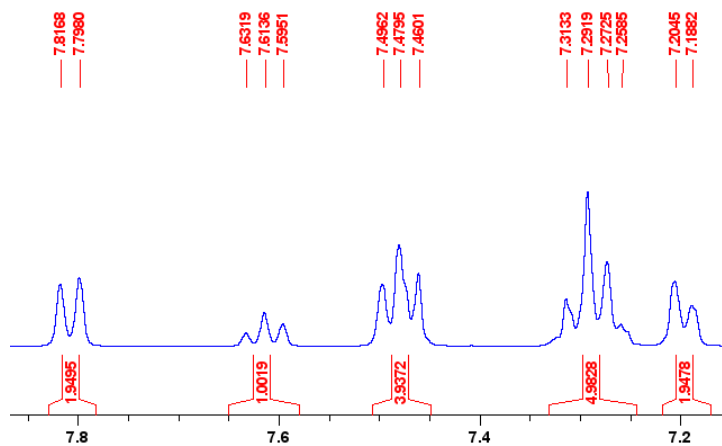

<sup>13</sup>C NMR of 3g

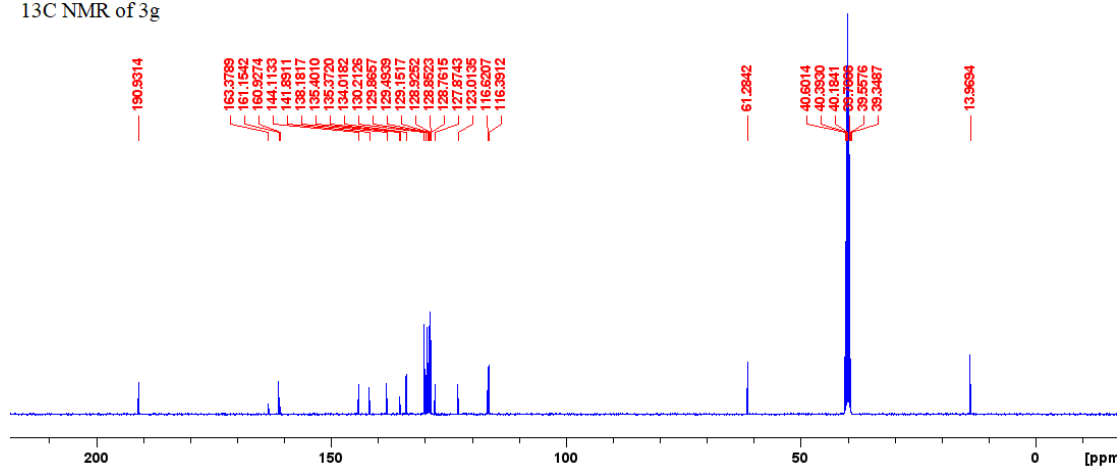

<sup>1</sup>H NMR of 3h

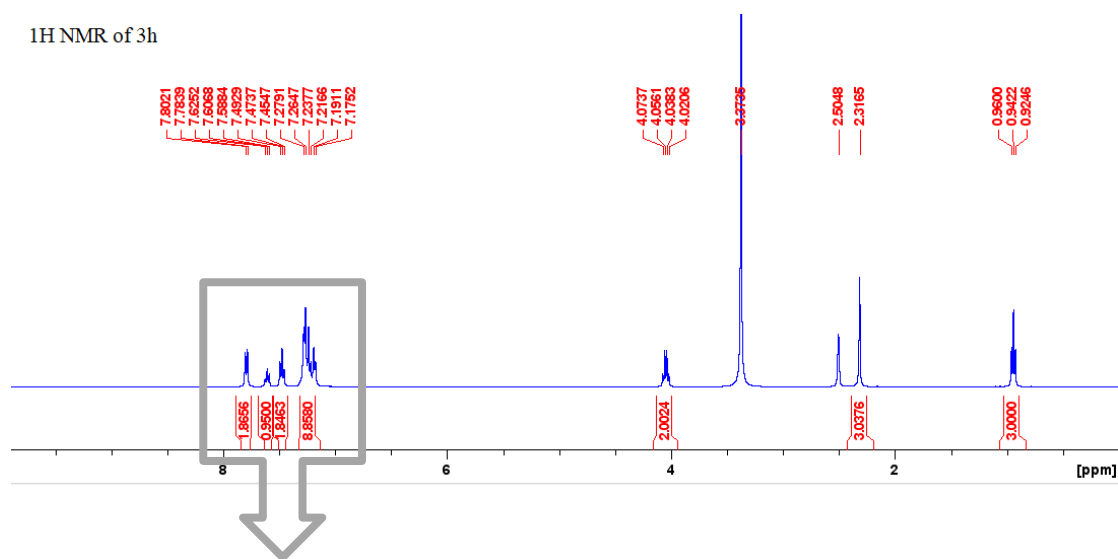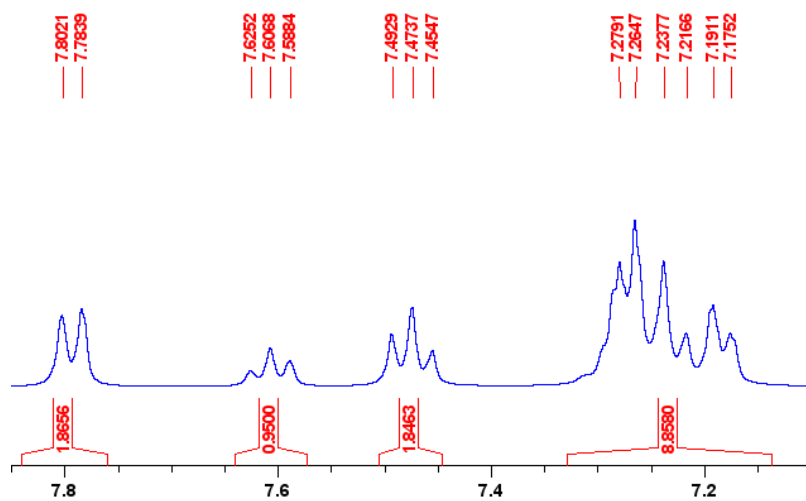

<sup>13</sup>C NMR of 3h

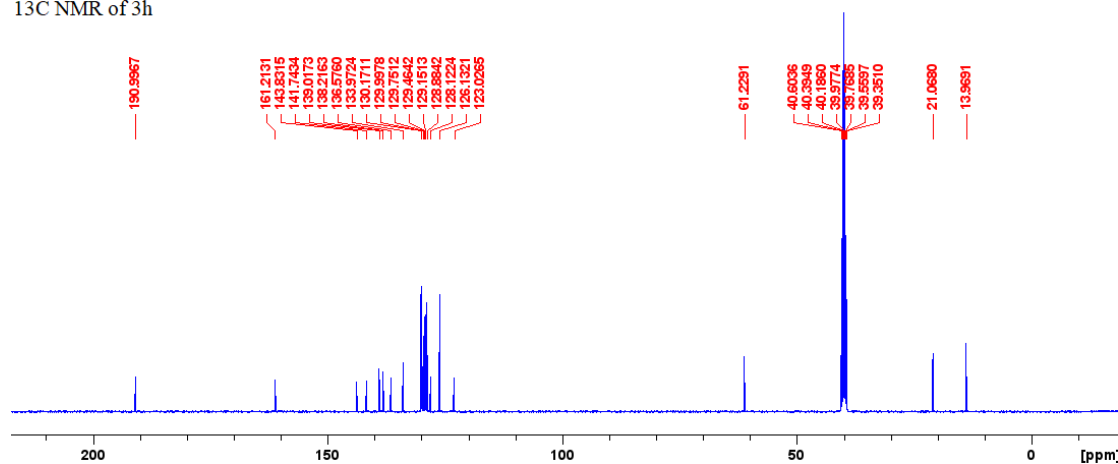

## S4:checkCIF (basic structural check) running

---

Checking for embedded fcf data in CIF ...

Found embedded fcf data in CIF. Extracting fcf data from uploaded CIF, please wait ...

## checkCIF/PLATON (basic structural check)

---

Structure factors have been supplied for datablock(s) shelx

THIS REPORT IS FOR GUIDANCE ONLY. IF USED AS PART OF A REVIEW  
PROCEDURE FOR PUBLICATION, IT SHOULD NOT REPLACE THE EXPERTISE  
OF AN EXPERIENCED CRYSTALLOGRAPHIC REFEREE.

No syntax errors found. [CIF dictionary](#)

Please wait while processing .... [Interpreting this report](#)

[Structure factor report](#)

### Datablock: shelx

---

Bond precision: C-C = 0.0047 Å Wavelength=0.71073  
Cell: a=10.2905(5) b=11.9920(7) c=16.5715(10)  
alpha=78.698(5) beta=81.660(5) gamma=80.197(4)

Temperature: 293 K

|                        | Calculated      | Reported        |
|------------------------|-----------------|-----------------|
| Volume                 | 1962.8(2)       | 1962.8(2)       |
| Space group            | P -1            | P -1            |
| Hall group             | -P 1            | -P 1            |
| Moiety formula         | C24 H17 F N2 O2 | ?               |
| Sum formula            | C24 H17 F N2 O2 | C24 H17 F N2 O2 |
| Mr                     | 384.40          | 384.39          |
| Dx, g cm <sup>-3</sup> | 1.301           | 1.301           |
| Z                      | 4               | 4               |
| Mu (mm <sup>-1</sup> ) | 0.090           | 0.090           |
| F000                   | 800.0           | 800.0           |
| F000'                  | 800.39          |                 |
| h, k, lmax             | 14, 16, 22      | 13, 16, 22      |
| Nref                   | 10678           | 9674            |
| Tmin, Tmax             |                 |                 |
| Tmin'                  |                 |                 |

Correction method= Not given

Data completeness= 0.906

Theta (max)= 29.244

R(reflections)= 0.0741( 4481)

wR2(reflections)=  
0.2682( 9674)

S = 1.055

Npar= 524

---

The following ALERTS were generated. Each ALERT has the format

**test-name ALERT alert-type alert-level.**

Click on the hyperlinks for more details of the test.

---

### ● Alert level C

[PLAT026 ALERT 3 C](#) Ratio Observed / Unique Reflections (too) Low ..  
46% Check  
[PLAT052 ALERT 1 C](#) Info on Absorption Correction Method Not Given  
Please Do !  
[PLAT053 ALERT 1 C](#) Minimum Crystal Dimension Missing (or Error) ...  
Please Check  
[PLAT054 ALERT 1 C](#) Medium Crystal Dimension Missing (or Error) ...  
Please Check  
[PLAT055 ALERT 1 C](#) Maximum Crystal Dimension Missing (or Error) ...  
Please Check  
[PLAT084 ALERT 3 C](#) High wR2 Value (i.e. > 0.25) .....  
0.27 Report  
[PLAT242 ALERT 2 C](#) Low 'MainMol' Ueq as Compared to Neighbors of  
C21 Check  
[PLAT334 ALERT 2 C](#) Small Aver. Benzene C-C Dist C18 -C23  
1.37 Ang.  
[PLAT334 ALERT 2 C](#) Small Aver. Benzene C-C Dist C41 -C46  
1.37 Ang.  
[PLAT340 ALERT 3 C](#) Low Bond Precision on C-C Bonds .....  
0.00468 Ang.  
[PLAT905 ALERT 3 C](#) Negative K value in the Analysis of Variance ...  
-1.929 Report

---

### ● Alert level G

[PLAT199 ALERT 1 G](#) Reported \_cell\_measurement\_temperature.....(K)  
293 Check  
[PLAT200 ALERT 1 G](#) Reported \_diffrn\_ambient\_temperature.....(K)  
293 Check  
[PLAT380 ALERT 4 G](#) Incorrectly? Oriented X(sp2)-Methyl Moiety .....  
C24 Check  
[PLAT380 ALERT 4 G](#) Incorrectly? Oriented X(sp2)-Methyl Moiety .....  
C48 Check  
[PLAT480 ALERT 4 G](#) Long H...A H-Bond Reported H42 ..F1 .  
2.58 Ang.  
[PLAT883 ALERT 1 G](#) No Info/Value for \_atom\_sites\_solution\_primary .  
Please Do !  
[PLAT912 ALERT 4 G](#) Missing # of FCF Reflections Above STh/L= 0.600  
968 Note  
[PLAT941 ALERT 3 G](#) Average HKL Measurement Multiplicity .....  
3.1 Low  
[PLAT978 ALERT 2 G](#) Number C-C Bonds with Positive Residual Density.  
0 Info

---

0 **ALERT level A** = Most likely a serious problem - resolve or explain  
0 **ALERT level B** = A potentially serious problem, consider carefully

11 **ALERT level C** = Check. Ensure it is not caused by an omission or oversight

9 **ALERT level G** = General information/check it is not something unexpected

13 ALERT type 1 CIF construction/syntax error, inconsistent or missing data

4 ALERT type 2 Indicator that the structure model may be wrong or deficient

7 ALERT type 3 Indicator that the structure quality may be low

4 ALERT type 4 Improvement, methodology, query or suggestion

0 ALERT type 5 Informative message, check

---

It is advisable to attempt to resolve as many as possible of the alerts in all categories. Often the minor alerts point to easily fixed oversights, errors and omissions in your CIF or refinement strategy, so attention to these fine details can be worthwhile. In order to resolve some of the more serious problems it may be necessary to carry out additional measurements or structure refinements. However, the purpose of your study may justify the reported deviations and the more serious of these should normally be commented upon in the discussion or experimental section of a paper or in the "special\_details" fields of the CIF. checkCIF was carefully designed to identify outliers and unusual parameters, but every test has its limitations and alerts that are not important in a particular case may appear. Conversely, the absence of alerts does not guarantee there are no aspects of the results needing attention. It is up to the individual to critically assess their own results and, if necessary, seek expert advice.

### **Publication of your CIF in IUCr journals**

A basic structural check has been run on your CIF. These basic checks will be run on all CIFs submitted for publication in IUCr journals (*Acta Crystallographica*, *Journal of Applied Crystallography*, *Journal of Synchrotron Radiation*); however, if you intend to submit to *Acta Crystallographica Section C* or *E* or *IUCrData*, you should make sure that [full publication checks](#) are run on the final version of your CIF prior to submission.

### **Publication of your CIF in other journals**

Please refer to the *Notes for Authors* of the relevant journal for any special instructions relating to CIF submission.

---

**PLATON version of 19/02/2022; check.def file version of 19/02/2022**

## **Datablock shelx - ellipsoid plot**

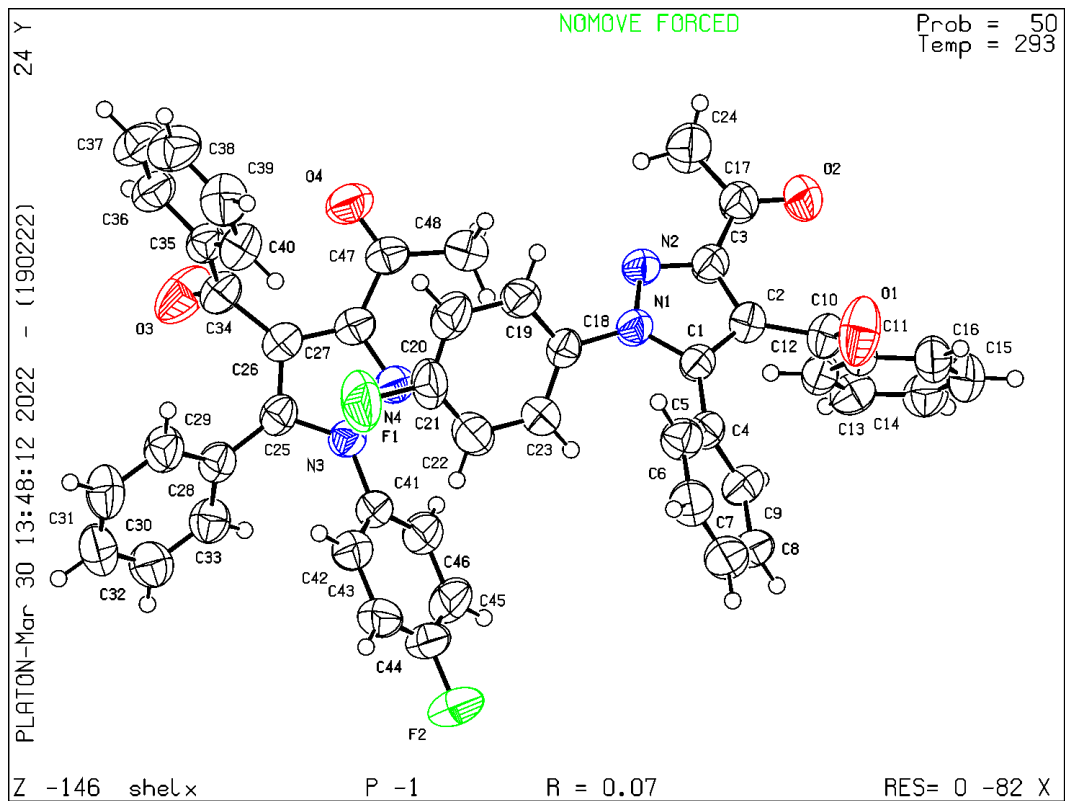

## S:5 checkCIF (basic structural check) running

---

Checking for embedded fcf data in CIF ...

Found embedded fcf data in CIF. Extracting fcf data from uploaded CIF, please wait ...

## checkCIF/PLATON (basic structural check)

---

Structure factors have been supplied for datablock(s) shelx

THIS REPORT IS FOR GUIDANCE ONLY. IF USED AS PART OF A REVIEW  
PROCEDURE FOR PUBLICATION, IT SHOULD NOT REPLACE THE EXPERTISE  
OF AN EXPERIENCED CRYSTALLOGRAPHIC REFEREE.

No syntax errors found. [CIF dictionary](#)

Please wait while processing .... [Interpreting this report](#)

[Structure factor report](#)

### Datablock: shelx

---

Bond precision: C-C = 0.0031 Å Wavelength=0.71073

Cell: a=11.4370 (6) b=8.8132 (4) c=21.0108 (12)

alpha=90 beta=92.604 (5) gamma=90

Temperature: 293 K

|                        | Calculated       | Reported         |
|------------------------|------------------|------------------|
| Volume                 | 2115.63 (19)     | 2115.63 (19)     |
| Space group            | P 21/n           | P 21/n           |
| Hall group             | -P 2yn           | -P 2yn           |
| Moiety formula         | C25 H17 F3 N2 O2 | ?                |
| Sum formula            | C25 H17 F3 N2 O2 | C25 H17 F3 N2 O2 |
| Mr                     | 434.41           | 434.40           |
| Dx, g cm <sup>-3</sup> | 1.364            | 1.364            |
| Z                      | 4                | 4                |
| Mu (mm <sup>-1</sup> ) | 0.105            | 0.105            |
| F000                   | 896.0            | 896.0            |
| F000'                  | 896.53           |                  |
| h, k, lmax             | 15, 12, 28       | 15, 11, 28       |
| Nref                   | 5673             | 5109             |
| Tmin, Tmax             |                  |                  |
| Tmin'                  |                  |                  |

Correction method= Not given

Data completeness= 0.901

Theta (max)= 29.097



R(reflections)= 0.0545( 3133)

wR2(reflections)=  
0.1617( 5109)

S = 1.023

Npar= 316

---

The following ALERTS were generated. Each ALERT has the format

**test-name ALERT alert-type alert-level.**

Click on the hyperlinks for more details of the test.

---

### ● Alert level C

[PLAT052 ALERT 1 C](#) Info on Absorption Correction Method Not Given  
Please Do !

[PLAT053 ALERT 1 C](#) Minimum Crystal Dimension Missing (or Error) ...  
Please Check

[PLAT054 ALERT 1 C](#) Medium Crystal Dimension Missing (or Error) ...  
Please Check

[PLAT055 ALERT 1 C](#) Maximum Crystal Dimension Missing (or Error) ...  
Please Check

[PLAT213 ALERT 2 C](#) Atom F3A has ADP max/min Ratio .....  
3.3 prolat

[PLAT213 ALERT 2 C](#) Atom F3B has ADP max/min Ratio .....  
3.1 prolat

[PLAT234 ALERT 4 C](#) Large Hirshfeld Difference F3A --C25 .  
0.18 Ang.

---

### ● Alert level G

[PLAT199 ALERT 1 G](#) Reported \_cell\_measurement\_temperature.....(K)  
293 Check

[PLAT200 ALERT 1 G](#) Reported \_diffrn\_ambient\_temperature.....(K)  
293 Check

[PLAT242 ALERT 2 G](#) Low 'MainMol' Ueq as Compared to Neighbors of  
C25 Check

[PLAT300 ALERT 4 G](#) Atom Site Occupancy of F1A Constrained at  
0.6 Check

#### And 5 other PLAT300 Alerts

More ...

[PLAT301 ALERT 3 G](#) Main Residue Disorder .....(Resd 1 )  
9% Note

[PLAT380 ALERT 4 G](#) Incorrectly? Oriented X(sp2)-Methyl Moiety .....  
C24 Check

[PLAT883 ALERT 1 G](#) No Info/Value for \_atom\_sites\_solution\_primary .  
Please Do !

[PLAT910 ALERT 3 G](#) Missing # of FCF Reflection(s) Below Theta(Min).  
4 Note

[PLAT912 ALERT 4 G](#) Missing # of FCF Reflections Above STh/L= 0.600  
553 Note

[PLAT941 ALERT 3 G](#) Average HKL Measurement Multiplicity .....  
3.4 Low

[PLAT978 ALERT 2 G](#) Number C-C Bonds with Positive Residual Density.  
1 Info

[PLAT992 ALERT 5 G](#) Repd & Actual \_reflns\_number\_gt Values Differ by  
3 Check

---

0 **ALERT level A** = Most likely a serious problem - resolve or explain  
0 **ALERT level B** = A potentially serious problem, consider carefully

7 **ALERT level C** = Check. Ensure it is not caused by an omission or oversight

17 **ALERT level G** = General information/check it is not something unexpected

13 ALERT type 1 CIF construction/syntax error, inconsistent or missing data

4 ALERT type 2 Indicator that the structure model may be wrong or deficient

3 ALERT type 3 Indicator that the structure quality may be low

9 ALERT type 4 Improvement, methodology, query or suggestion

1 ALERT type 5 Informative message, check

---

It is advisable to attempt to resolve as many as possible of the alerts in all categories. Often the minor alerts point to easily fixed oversights, errors and omissions in your CIF or refinement strategy, so attention to these fine details can be worthwhile. In order to resolve some of the more serious problems it may be necessary to carry out additional measurements or structure refinements. However, the purpose of your study may justify the reported deviations and the more serious of these should normally be commented upon in the discussion or experimental section of a paper or in the "special\_details" fields of the CIF. checkCIF was carefully designed to identify outliers and unusual parameters, but every test has its limitations and alerts that are not important in a particular case may appear. Conversely, the absence of alerts does not guarantee there are no aspects of the results needing attention. It is up to the individual to critically assess their own results and, if necessary, seek expert advice.

### **Publication of your CIF in IUCr journals**

A basic structural check has been run on your CIF. These basic checks will be run on all CIFs submitted for publication in IUCr journals (*Acta Crystallographica*, *Journal of Applied Crystallography*, *Journal of Synchrotron Radiation*); however, if you intend to submit to *Acta Crystallographica Section C* or *E* or *IUCrData*, you should make sure that [full publication checks](#) are run on the final version of your CIF prior to submission.

### **Publication of your CIF in other journals**

Please refer to the *Notes for Authors* of the relevant journal for any special instructions relating to CIF submission.

---

**PLATON version of 19/02/2022; check.def file version of 19/02/2022**  
**Datablock shelx - ellipsoid plot**

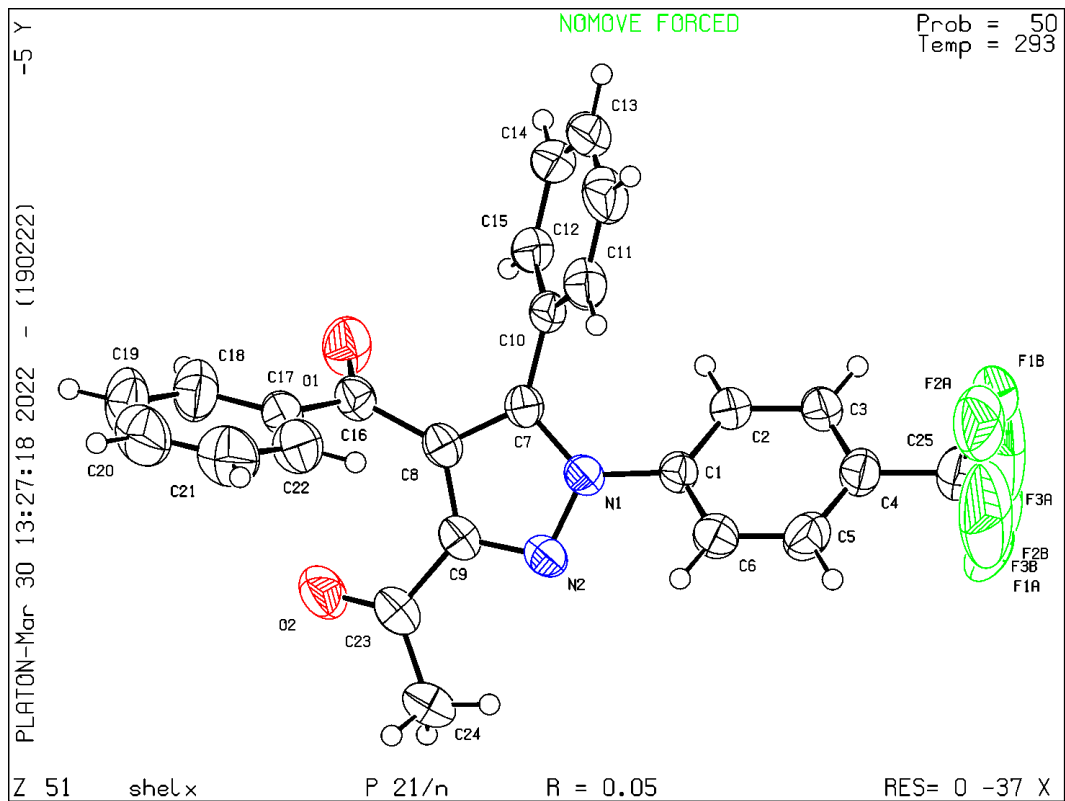

Supplement: s1 [file s1]
